# Supplementary material for: Circulating Osteonectin and Adipokine Profiles in Relation to Metabolically Healthy Obesity in Chinese Children: Findings From BCAMS
Source: PubMed Central journal article supplement — J Am Heart Assoc. 2018 Nov 22;7(23):e009169. doi: 10.1161/JAHA.118.009169 (PMC6405551; doi:10.1161/jaha.118.009169), 2018-11-22
Supplement: JAH3-7-e009169-s001.pdf [file JAH3-7-e009169-s001.pdf]

# **SUPPLEMENTAL MATERIAL**

**Table S1. The levels of adipokines according pubertal development.**

| Adipokines            | Normal weight healthy |              |               |                  | Metabolically healthy obese |             |              |          | Metabolically unhealthy obese |              |              |                  |
|-----------------------|-----------------------|--------------|---------------|------------------|-----------------------------|-------------|--------------|----------|-------------------------------|--------------|--------------|------------------|
|                       | Pre-puberty           | Mid-puberty  | Post-puberty  | <i>P</i>         | Pre-puberty                 | Mid-puberty | Post-puberty | <i>P</i> | Pre-puberty                   | Mid-puberty  | Post-puberty | <i>P</i>         |
| Leptin (ng/ml) &      | 0.26 ± 0.14           | 0.39 ± 0.05  | 0.97 ± 0.14*# | <b>&lt;0.001</b> | 2.29 ± 0.20                 | 2.25 ± 0.13 | 2.29 ± 0.44  | 0.964    | 2.63 ± 0.09                   | 2.54 ± 0.05  | 2.69 ± 0.10  | 0.118            |
| Adiponectin (ug/ml) & | 1.84 ± 0.09           | 1.81 ± 0.03  | 2.06 ± 0.09#  | <b>0.001</b>     | 1.83 ± 0.14                 | 1.48 ± 0.09 | 1.35 ± 0.31  | 0.129    | 1.65 ± 0.06                   | 1.40 ± 0.03* | 1.34 ± 0.07* | <b>&lt;0.001</b> |
| Leptin/adiponectin&   | -1.55 ± 0.18          | -1.40 ± 0.06 | -1.09 ± 0.17  | 0.243            | 0.46 ± 0.25                 | 0.78 ± 0.16 | 0.94± 0.55   | 0.630    | 0.98 ± 0.10                   | 1.14 ± 0.06  | 1.34 ± 0.12  | 0.207            |
| FGF21 (pg/ml) &       | 6.84 ± 0.23           | 6.49 ± 0.08  | 6.22 ± 0.22   | 0.306            | 6.50 ± 0.29                 | 6.23 ± 0.21 | 6.11 ± 0.67  | 0.785    | 6.33 ± 0.15                   | 6.14 ± 0.08  | 6.47 ± 0.18  | <b>0.030</b>     |
| Resistin (ng/ml) &    | 2.76 ± 0.09           | 2.67 ± 0.03  | 2.66 ± 0.09   | 0.555            | 2.84 ± 0.14                 | 2.88 ± 0.09 | 2.60 ± 0.31  | 0.287    | 2.72 ± 0.06                   | 2.79 ± 0.03  | 2.84 ± 0.07  | 0.536            |
| RBP-4 (ug/ml) &       | 3.41 ± 0.06           | 3.35 ± 0.02  | 3.28 ± 0.06   | 0.518            | 3.40 ± 0.07                 | 3.52 ± 0.05 | 3.61 ± 0.161 | 0.538    | 3.56 ± 0.03                   | 3.57 ± 0.02  | 3.58 ± 0.04  | 0.936            |
| Osteonectin (ug/ml) & | 0.01 ± 0.05           | 0.03 ± 0.03  | -0.06 ± 0.05  | 0.235            | -0.05 ± 0.06                | 0.09 ± 0.07 | 0.13 ± 0.12  | 0.364    | 0.17± 0.04                    | 0.14 ± 0.03  | 0.10 ± 0.05  | 0.692            |

The puberty categories were defined as prepuberty (Tanner stage 1), midpuberty (Tanner stage 2-3), postpuberty (Tanner stage ≥ 4).

& Skewed distributions were natural logarithmically (ln) transformed.

Data were expressed as mean ± SEM. General liner model was used to assess the differences among the three groups after adjusting for age, sex, residence, diet score, and physical activity.

Where differences versus prepuberty group were indicated as \**P* < 0.05, differences versus Midpuberty group were indicated as #*P* < 0.05.

Values in bold are significant at *P* < 0.05.

FGF21, Fibroblast growth factor 21; RBP-4, Retinol binding protein 4.

**Table S2. The levels of adipokines according to sex.**

| Adipokines                           | Normal weight healthy |               |                  | Metabolically healthy obese |              |              | Metabolically unhealthy obese |             |                  |
|--------------------------------------|-----------------------|---------------|------------------|-----------------------------|--------------|--------------|-------------------------------|-------------|------------------|
|                                      | Male                  | Female        | <i>P</i>         | Male                        | Female       | <i>P</i>     | Male                          | Female      | <i>P</i>         |
| Leptin (ng/ml) <sup>&amp;</sup>      | 0.034 ± 0.05          | 0.91 ± 0.04   | <b>&lt;0.001</b> | 2.14 ± 0.08                 | 2.49 ± 0.10  | <b>0.010</b> | 2.46 ± 0.04                   | 2.90 ± 0.05 | <b>&lt;0.001</b> |
| Adiponectin (ug/ml) <sup>&amp;</sup> | 1.83 ± 0.03           | 1.95 ± 0.03   | <b>0.005</b>     | 1.57 ± 0.05                 | 1.76 ± 0.07  | <b>0.048</b> | 1.48 ± 0.02                   | 1.47 ± 0.03 | 0.700            |
| Leptin/adiponectin <sup>&amp;</sup>  | -1.79 ± 0.06          | -1.03 ± 0.05  | <b>&lt;0.001</b> | 0.57 ± 0.09                 | 0.73 ± 0.12  | 0.329        | 0.97 ± 0.04                   | 1.43 ± 0.06 | <b>&lt;0.001</b> |
| FGF21 (pg/ml) <sup>&amp;</sup>       | 6.52 ± 0.08           | 6.50 ± 0.06   | 0.835            | 6.43 ± 0.11                 | 6.25 ± 0.15  | 0.378        | 6.24 ± 0.06                   | 6.40 ± 0.08 | 0.153            |
| Resistin (ng/ml) <sup>&amp;</sup>    | 2.65 ± 0.03           | 2.73 ± 0.03   | 0.099            | 2.80 ± 0.05                 | 2.80 ± 0.07  | 0.987        | 2.74 ± 0.02                   | 2.84 ± 0.03 | <b>0.020</b>     |
| RBP-4 (ug/ml) <sup>&amp;</sup>       | 3.34 ± 0.02           | 3.35 ± 0.02   | 0.839            | 3.44 ± 0.03                 | 3.52 ± 0.04  | 0.090        | 3.58 ± 0.01                   | 3.54 ± 0.02 | 0.116            |
| Osteonectin (ug/ml) <sup>&amp;</sup> | -0.003 ± 0.03         | -0.016 ± 0.02 | 0.738            | 0.08 ± 0.04                 | -0.06 ± 0.06 | 0.095        | 0.15 ± 0.02                   | 0.13 ± 0.03 | 0.621            |

<sup>&</sup> Skewed distributions were natural logarithmically (ln) transformed.

Data were expressed as mean ± SEM. General liner model was used to assess the differences between the two groups after adjusting for age, pubertal stages, residence, diet score, and physical activity.

Values in bold are significant at *P* < 0.05.

FGF21, Fibroblast growth factor 21; RBP-4, Retinol binding protein 4.

**Table S3. Area under ROC curves and optimal cut-offs of adipokines in predicting MUO.**

| Adipokines         | AUC   | 95%CI       | Optimal cut-offs | Sensitivity | Specificity | Youden index |
|--------------------|-------|-------------|------------------|-------------|-------------|--------------|
| RBP-4              | 0.604 | 0.564-0.643 | 37.08            | 0.441       | 0.741       | 0.182        |
| Osteonectin        | 0.573 | 0.532-0.614 | 1.11             | 0.527       | 0.595       | 0.122        |
| Leptin/adiponectin |       |             |                  |             |             |              |
| Male               | 0.653 | 0.592-0.694 | 2.44             | 0.594       | 0.633       | 0.227        |
| Female             | 0.686 | 0.626-0.746 | 2.78             | 0.674       | 0.624       | 0.298        |

ROC, Receiver operating characteristic curve; MUO, Metabolically unhealthy obesity; RBP-4, Retinol binding protein 4.

**Figure S1. Consort Diagram of the study sample.**

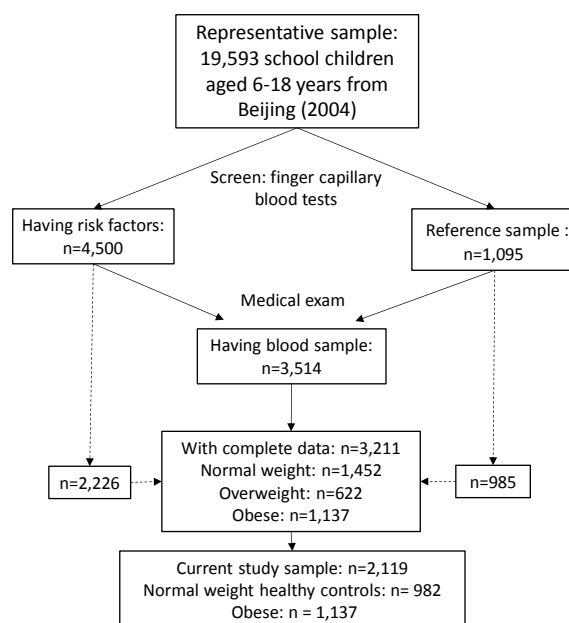

A representative sample of 19,593 children (aged 6–18 years, 50% boys) was recruited from the Beijing area between April and October, 2004. Within this cohort, a total of 4,500 subjects were identified to be at risk for metabolic syndrome based on having one or more of the following conditions: overweight, elevated blood pressure (BP) (systolic and/or diastolic BP  $\geq$  90th percentile), increased total cholesterol  $\geq$  5.2 (mmol/L), triglyceride  $\geq$  1.7 (mmol/L) or fasting blood glucose  $\geq$  5.6 (mmol/L) based on initial finger capillary blood tests. Further, all children at risk for metabolic syndrome, together with a parallel reference population of 1,095 schoolchildren, were invited to participate in a medical examination including venepuncture blood sample tests. Finally, 3,211 subjects (2,226 from subjects with risk of metabolic syndrome and 985 from reference school children) completed the full examination. The current study includes 1,137 obese participants and 982 normal weight healthy controls who had complete data for analysis.

---> : Indicating sample source.

**Figure S2. Comparison of adipokines levels between MHO and MUO after adjusting for waist circumference.**

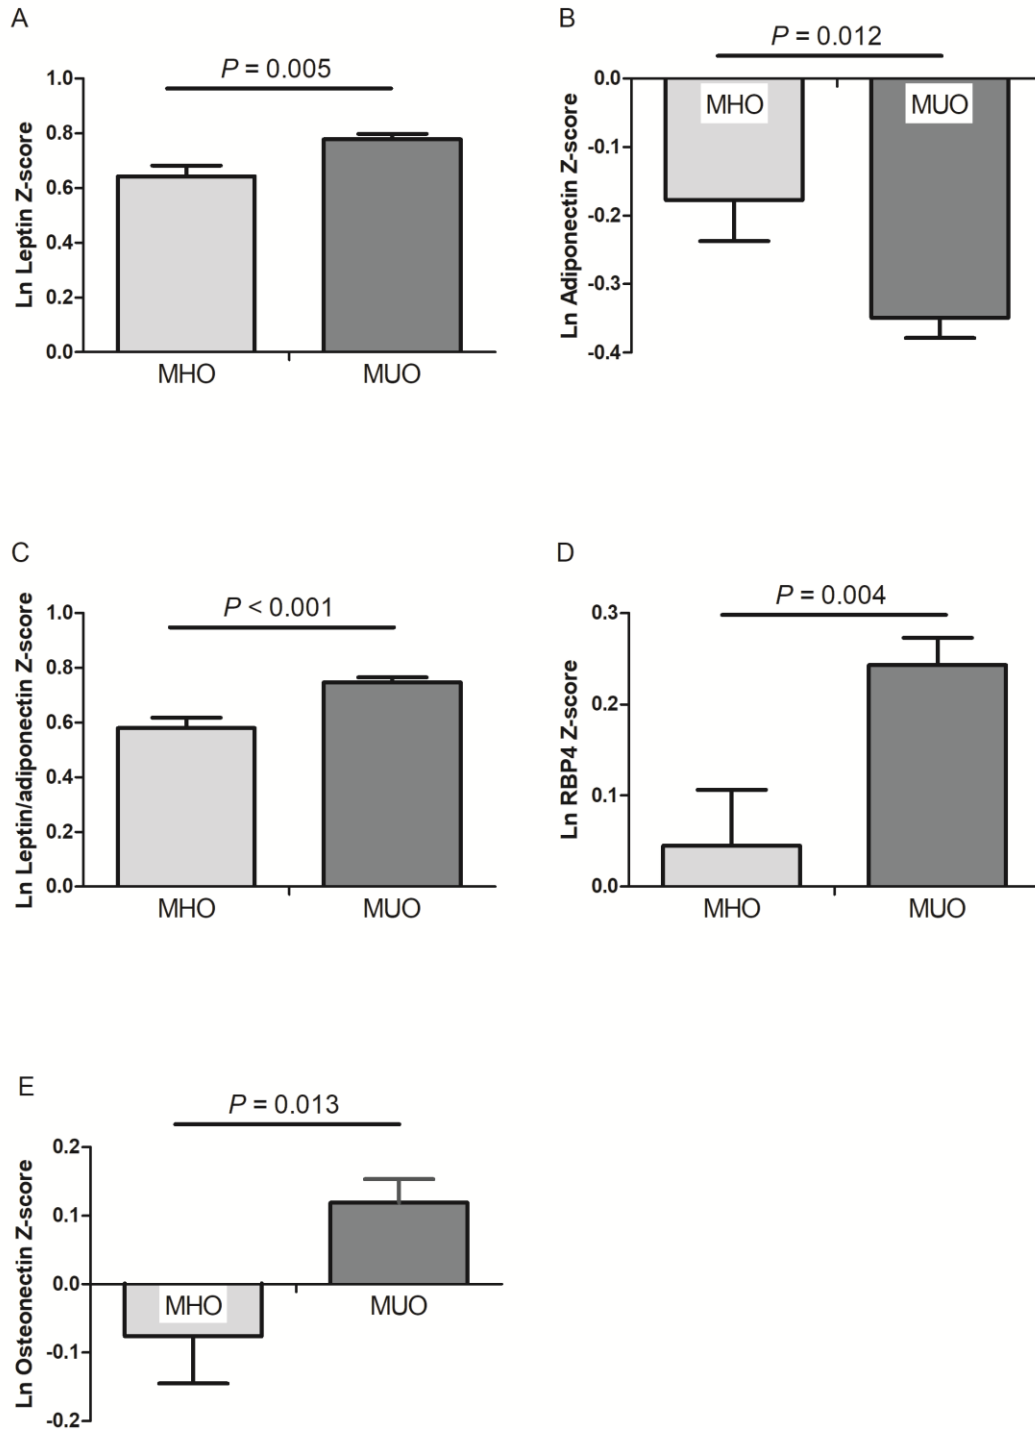

Data were analysed after natural logarithmic (ln) transformation and expressed in each SD units

after adjusting for age, pubertal stages, residence, diet score, physical activity and waist circumference. Comparisons between MHO and MUO for Ln Leptin Z-score (A), Ln Adiponectin Z-score (B), Ln Leptin/adiponectin Z-score (C), Ln RBP4 Z-score (D) and Ln Osteonectin Z-score (E). RBP-4, Retinol binding protein 4.
